# Supplementary material for: A Plant-Based Animal Fat Analog Produced by an Emulsion Gel of Alginate and Pea Protein
Source: MDPI journal article supplement (doi:10.3390/gels9050393), 2023-05-09
Supplement: s1 [file s1]

*Supplementary Material*

# A Plant-Based Animal Fat Analog Produced by an Emulsion Gel of Alginate and Pea Protein

Chong Teng and Osvaldo H. Campanella \*

Department of Food Science and Technology, Ohio State University, 2015 Fyffe Road,  
Columbus, OH 43210, USA; teng.165@buckeyemail.osu.edu

\* Correspondence: campanella.20@osu.edu; Tel.: +1-6142477646

## Supplementary Information

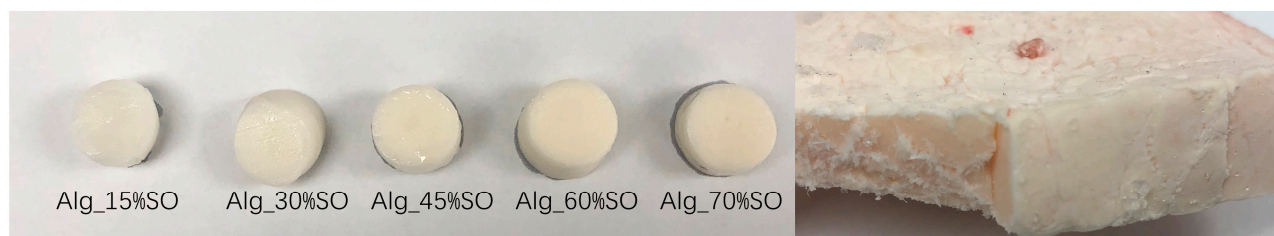

**Figure S1.** Gelled emulsions (left) and beef fat trimming.
